# Supplementary material for: Rewiring of Gene Expression in Pseudomonas aeruginosa During Diauxic Growth Reveals an Indirect Regulation of the MexGHI-OpmD Efflux Pump by Hfq
Source: PubMed Central journal article supplement (PMC9272787; doi:10.3389/fmicb.2022.919539), 2022-06-23
Supplement: Data_Sheet_2.pdf [file Data_Sheet_2.pdf]

## *Supplementary Material*

# **Rewiring of Gene Expression in *Pseudomonas aeruginosa* During Diauxic Growth Reveals an Indirect Regulation of the MexGHI-OpmD Efflux Pump by Hfq**

Marlena Rozner, Ella Nukarinen, Michael T. Wolfinger, Fabian Amman, Wolfram Weckwerth, Udo Bläsi\* and Elisabeth Sonnleitner\*

\*Correspondence:

udo.blaesi@univie.ac.at

elisabeth.sonnleitner@univie.ac.at

## **1 Supplementary Figures and Tables**

### **1.1 Supplementary Tables**

**Supplementary Table 1** Compilation of the T3/T1, T2/T1 and T3/T2 RNA-seq, Ribo-seq and translatoome datasets. The numbers of transcripts, ribosome footprints and peptides with a fold-change  $\geq 2$  or  $\leq 2$  and a multiple testing adjusted  $p$ -value  $\leq 0.05$  are listed in bold, whereas values below these thresholds are shown in pale writing.

### **1.2 Supplementary Figures**

**A**

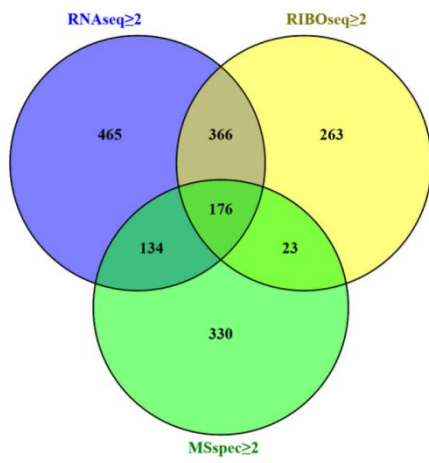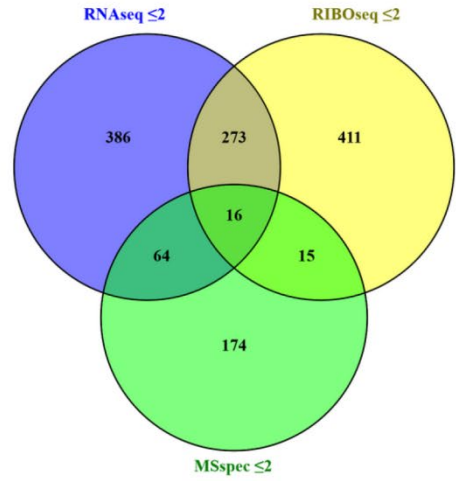

**B**

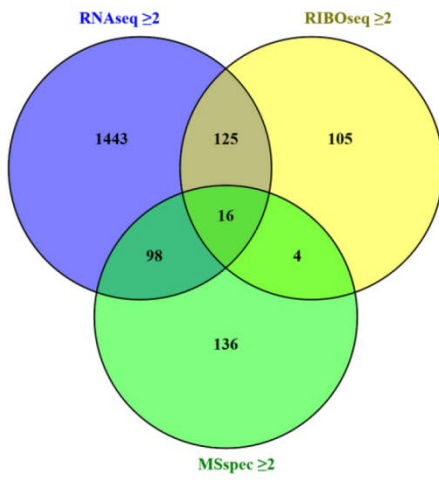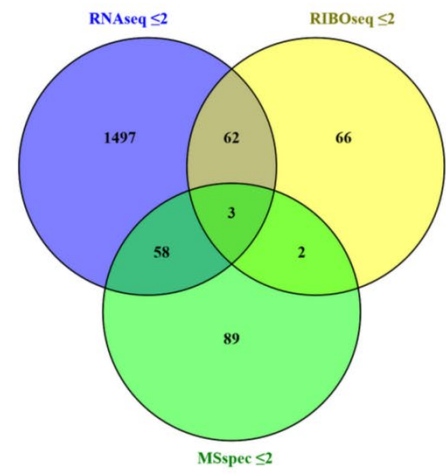

**C**

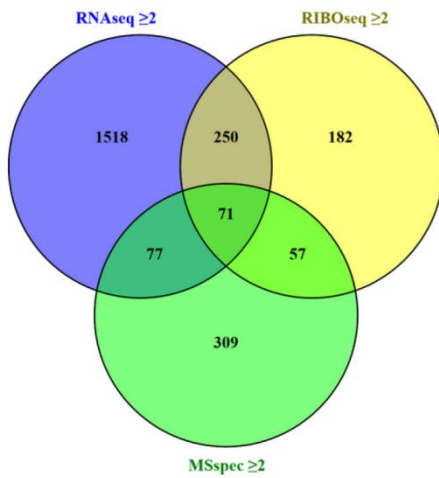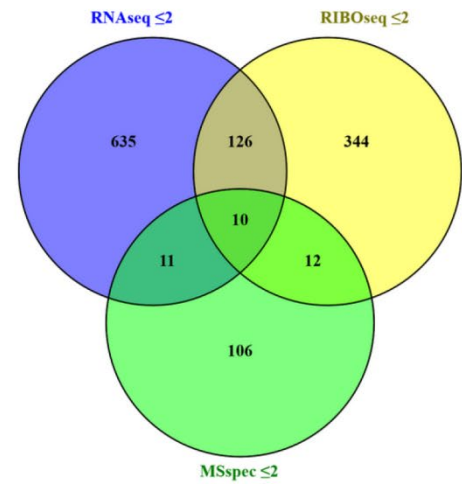

**Supplementary Figure S1** Venn diagrams showing the number of transcripts with increased (left panels) or decreased (right panels) abundance in RNA-seq, Ribo-seq and the MS data obtained after analysis of the following datasets: **(A)** T3 vs T1 (mannitol uptake vs succinate uptake); **(B)** T2 vs T1; **(C)** T3 vs T2; For significance only a  $FC \geq 2$  or  $\leq 2$  and a multiple testing adjusted  $p$ -value  $\leq 0.05$  are considered for the RNA-seq, Ribo-seq and MS data. The corresponding transcripts, ribosomal footprints and MS data with increased or decreased abundance are listed in **Supplementary Table 1**.

## T3 vs T1

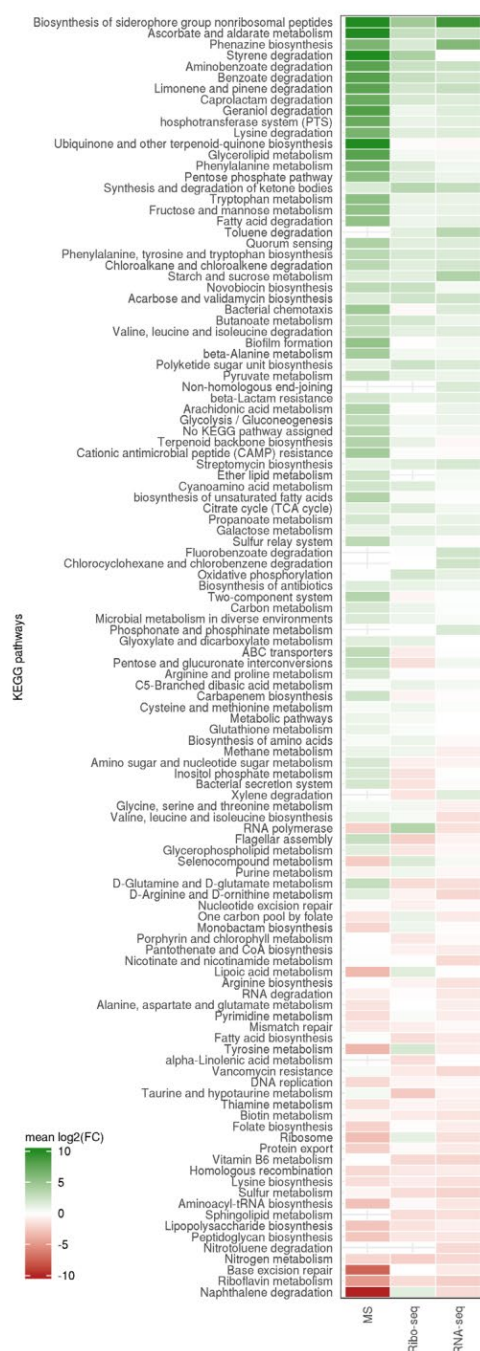

**Supplementary Figure S2** Meta-analysis of the dataset T3 vs T1 of normalized synthesis / expression of differentially abundant proteins resulting from the MS data and transcripts revealed by Ribo-seq and RNA-seq, respectively. The genes are grouped into the corresponding pathways ([http://www.kegg.jp/kegg-bin/show\\_organism?org=pae](http://www.kegg.jp/kegg-bin/show_organism?org=pae)). For each group the averaged log<sub>2</sub> fold changes of significantly modulated members are shown. The colour code shown in the scale at the left denotes log<sub>2</sub>-fold changes. Red indicates an overall decrease and green indicates an overall increase in the protein and mRNA levels in a particular pathway.

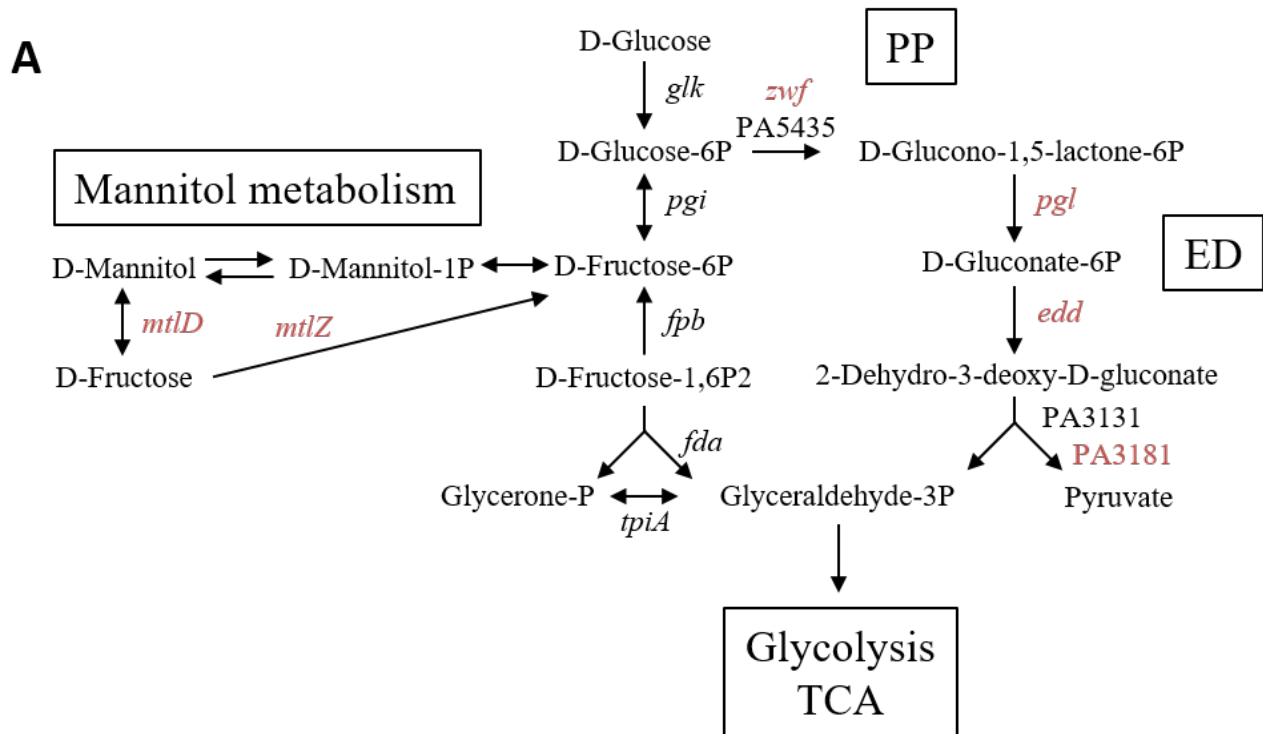

**B**

|                                  |             | T2 vs T1 |          |          |          |       |          |
|----------------------------------|-------------|----------|----------|----------|----------|-------|----------|
| PA number                        | gene name   | RNA-seq  |          | Ribo-seq |          | MS    |          |
|                                  |             | FC       | p-value  | FC       | p-value  | FC    | p-value  |
| <b>Pentose phosphate pathway</b> |             |          |          |          |          |       |          |
| PA3183                           | <i>zwf</i>  | 25.4     | 0.00E+00 | 1.91     | 2.94E-17 | 4.99  | 3.38E-04 |
| <b>Entner-Doudoroff pathway</b>  |             |          |          |          |          |       |          |
| PA3181                           | <i>edaA</i> | 82.5     | 0.00E+00 | 5.84     | 6.37E-54 |       |          |
| PA3194                           | <i>edd</i>  | 14.0     | 0.00E+00 | 2.28     | 4.86E-31 | -1.22 | 4.56E-01 |
| PA3182                           | <i>pgl</i>  | 85.6     | 0.00E+00 | 3.21     | 3.07E-31 | 7.09  | 3.70E-04 |
| <b>Mannitol metabolism</b>       |             |          |          |          |          |       |          |
| PA2344                           | <i>mtlD</i> | 17.2     | 0.00E+00 | 1.02     | 7.69E-01 | 1.42  | 5.73E-01 |
| PA2344                           | <i>mtlZ</i> | 8.14     | 0.00E+00 | 1.03     | 7.06E-01 | 1.61  | 5.95E-01 |

**Supplementary Figure S3 (A)** *Pae* utilizes the pentose phosphate (PP) and the Entner-Doudoroff (ED) pathways for metabolization of different carbohydrates, such as mannitol (Dolan et al., 2020; Park et al., 2020). Key enzymes for these pathways are highlighted in red. **(B)** RNA-seq, Ribo-seq and MS data for the functions highlighted in red in (A).
